# Supplementary material
Source: PubMed Central journal article supplement (PMC5935004)
Supplement: NIHMS954839-supplement-Supplementary_Data.pdf [file NIHMS954839-supplement-Supplementary_Data.pdf]

1 Supplementary Table 1

2 The expression levels of microtubule and functional protein in each group.

| Group                   | Control     | PNI-diabetics | HP hydrogel | Free GFs    | GFs-HP      |
|-------------------------|-------------|---------------|-------------|-------------|-------------|
| Ace-tubulin/<br>Tubulin | 0.550±0.007 | 0.314±0.019   | 0.344±0.031 | 0.448±0.020 | 0.560±0.020 |
| Tau/GAPDH               | 0.041±0.001 | 0.016±0.001   | 0.017±0.002 | 0.025±0.002 | 0.032±0.002 |
| GAP43/GAPDH             | 0.178±0.007 | 0.137±0.017   | 0.148±0.022 | 0.227±0.013 | 0.294±0.009 |

3 Data are expressed as mean ± SEM, n = 5 per group.

4

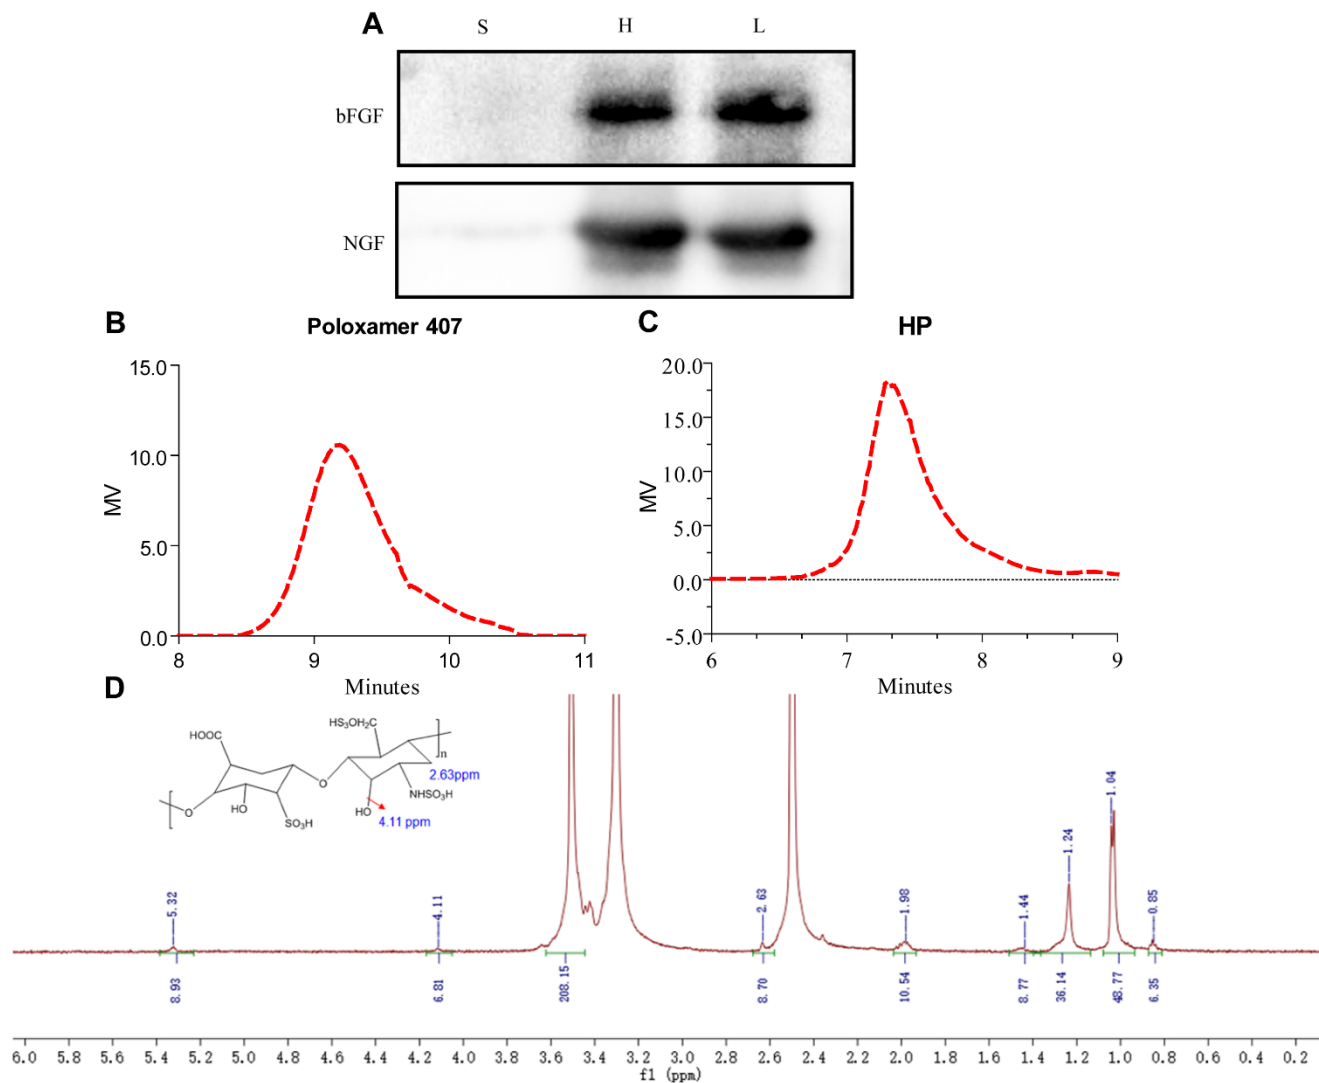

5

6

7 Supplementary figure 1: A. Western blotting analysis of the loading efficiency for NGF and bFGF (16 mg

8 HP, NGF and bFGF are both 0.1 mg). S: NGF in the supernatant after centrifugation. H: GFs in the settled

9 hydrogel solution. L: total amount of GFs in the loading solution Pure HP bound GFs with high loading

10 efficiency; B. The purity and molecular weight of synthetic HP were detected through gel permeation

11 chromatography (GPC); C. The purity and the Mw of HP were also evaluated through GPC; D. <sup>1</sup>H-nuclear

12 magnetic resonance (<sup>1</sup>H-NMR) spectra of HP.

HP

GFs-HP

x1000

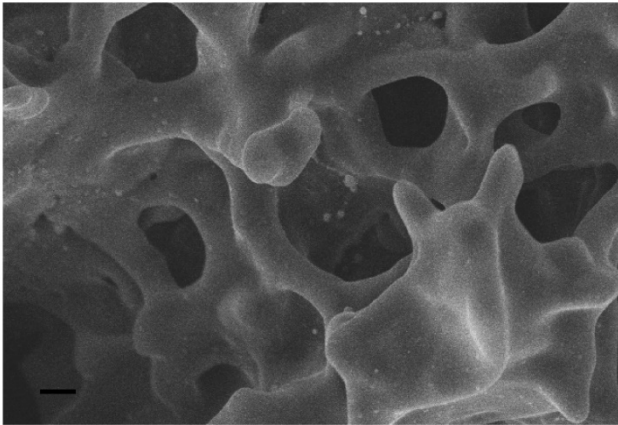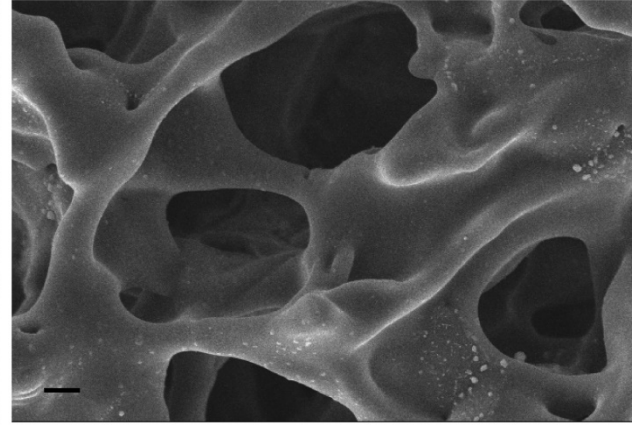

13

14

15 Supplementary figure 2: SEM micrograph of HP and GFs-HP in high magnification. The images revealed  
16 that HP and GFs-HP mainly consisted of interconnected porous domains. Scale bar = 50  $\mu\text{m}$ .

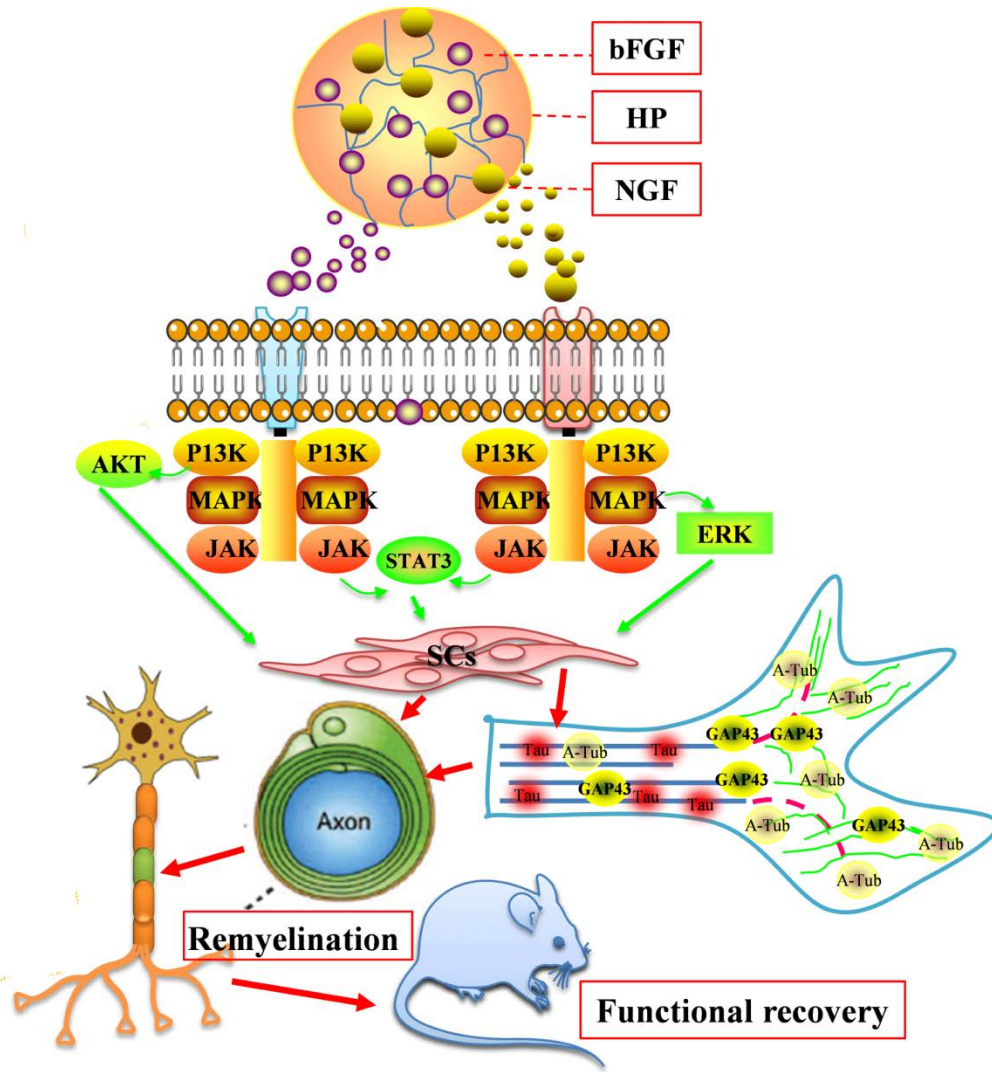

17

18 Supplementary figure 3: Illustration of proposed signaling mechanism of GFs-HP hydrogel's  
 19 neuroregenerative effects. bFGF and NGF released are from the HP hydrogel to bind with their receptors,  
 20 activating intracellular domains. Afterwards, the receptors activate the PI3K/Akt, JAK/STAT3 and  
 21 MAPK/ERK signal transduction pathways, possibly promoting SCs proliferation. Microtubule  
 22 stabilization and functional protein secretion may also be augmented, enhancing axonal-myelinated  
 23 partnership, leading to remyelination and restoration of myelinated fibers. Ultimately, morphological and  
 24 structural improvements accelerate functional recovery after sciatic nerve injury in diabetic rats.
